# Supplementary figures and images for: Design, synthesis and evaluation of a myricetin and nobiletin hybrid compound for alleviating hyperuricemia based on metabolomics and gut microbiota
Source: Royal Society of Chemistry journal article supplement (doi:10.1039/d3ra03188h), 2023-01-01

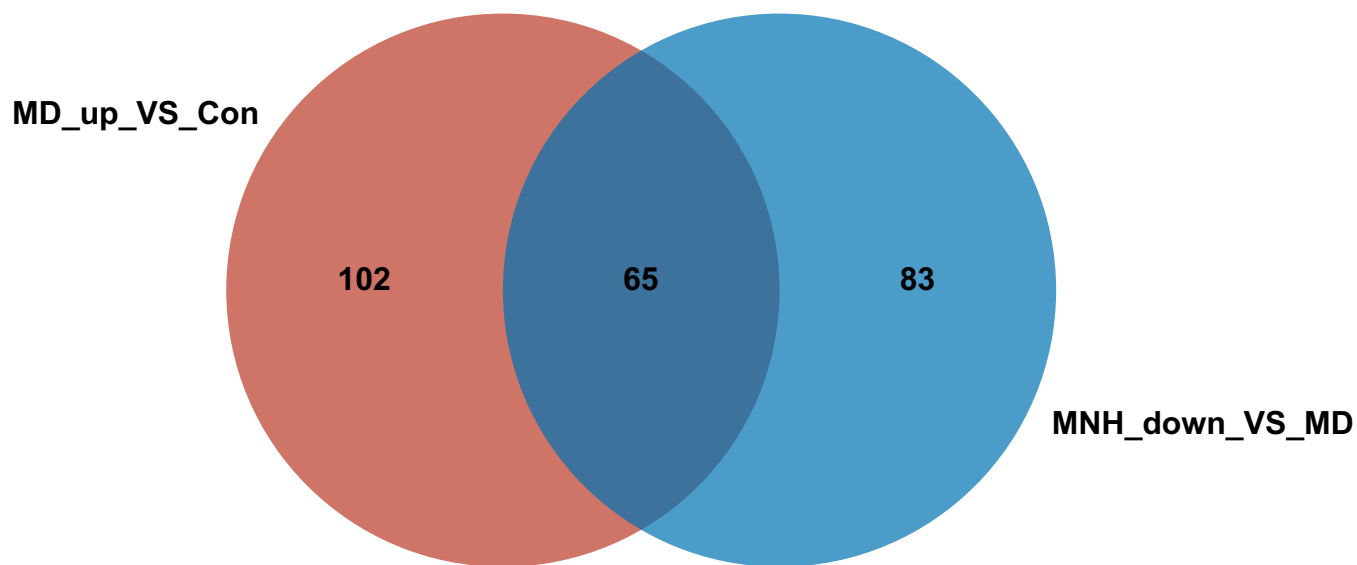

Supplement: d3ra03188h2.pdf [file d3ra03188h2.pdf]

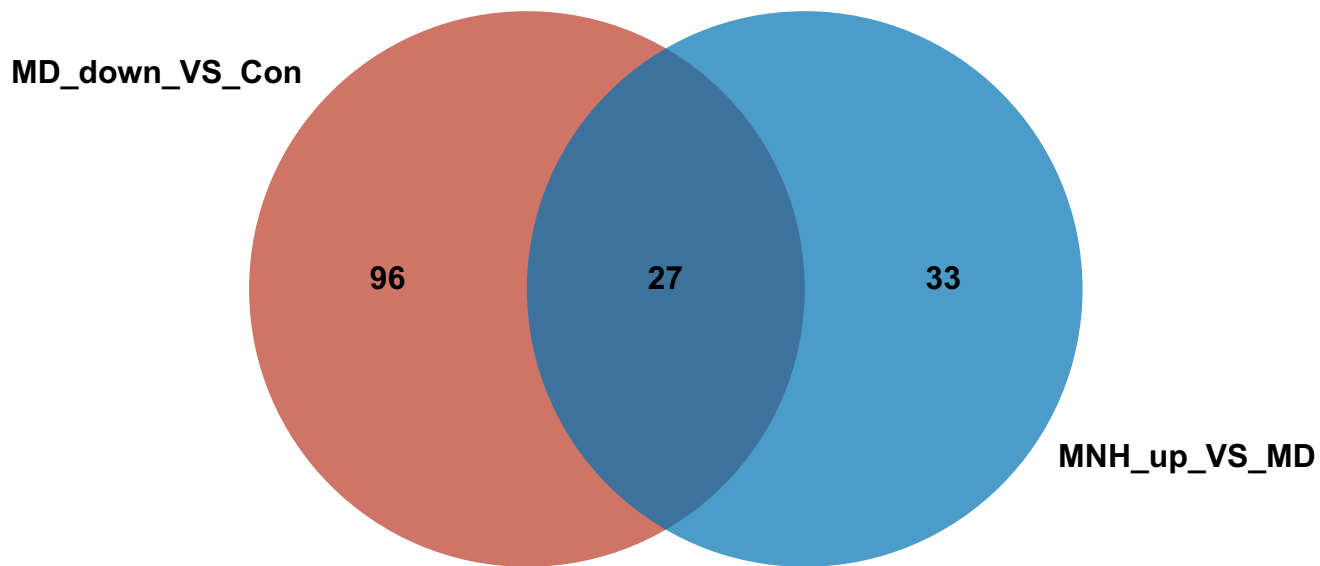

Supplement: d3ra03188h3.pdf [file d3ra03188h3.pdf]

# HeatmapTree

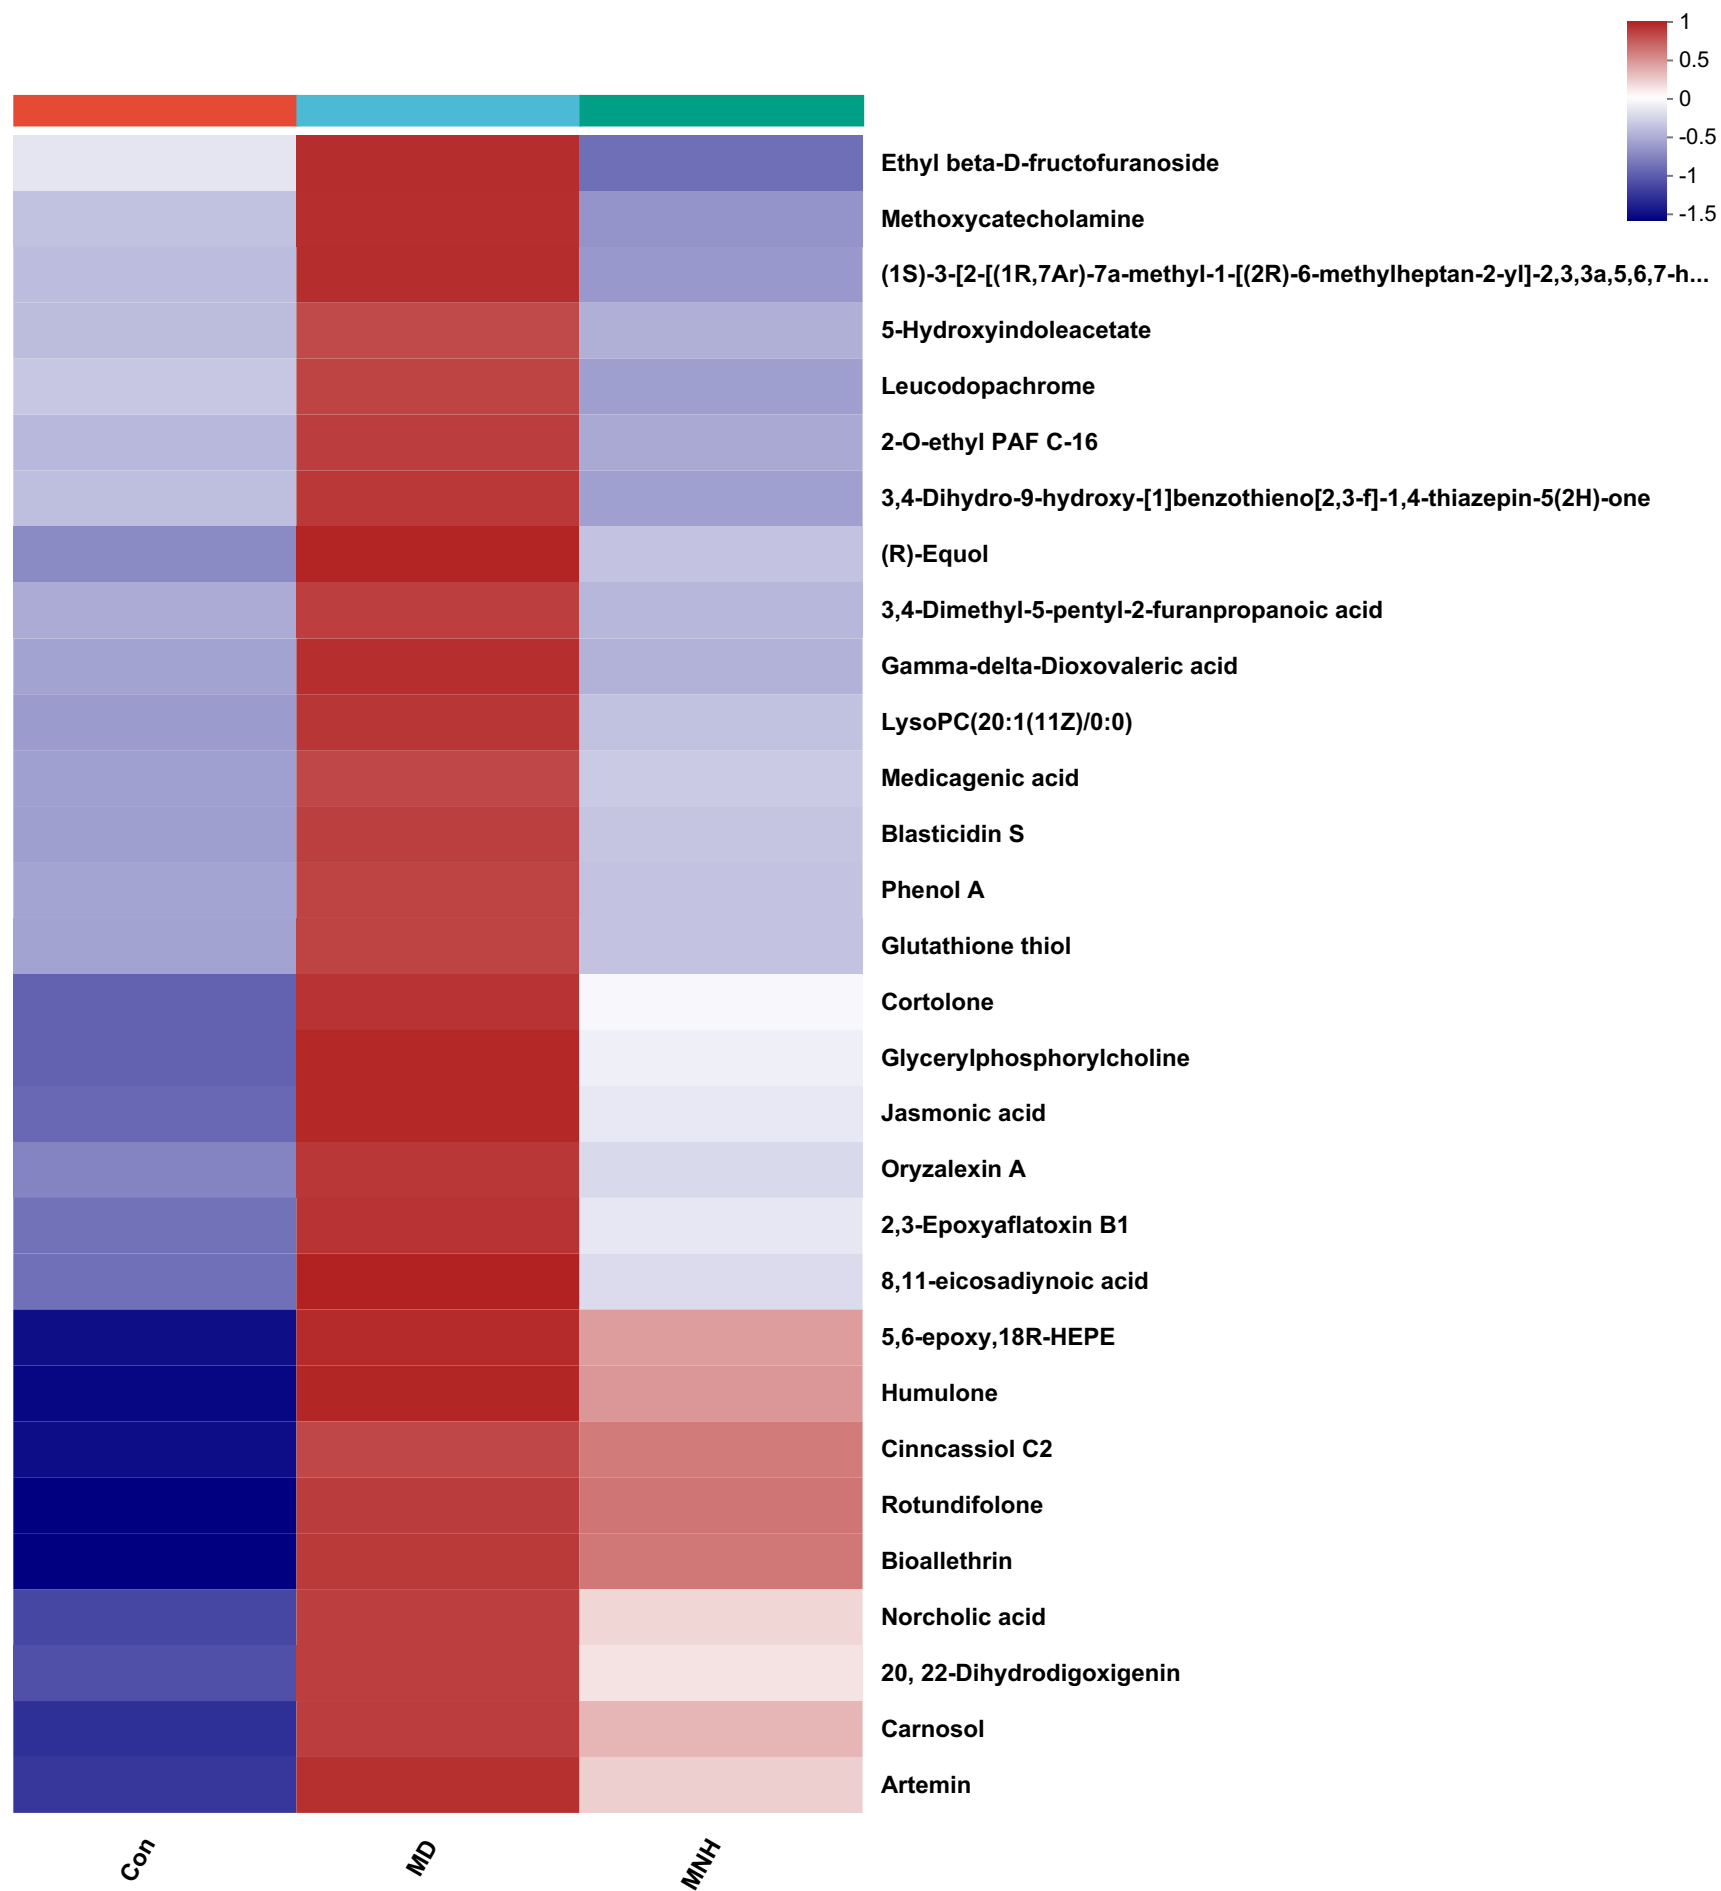

Supplement: d3ra03188h4.pdf [file d3ra03188h4.pdf]

# HeatmapTree

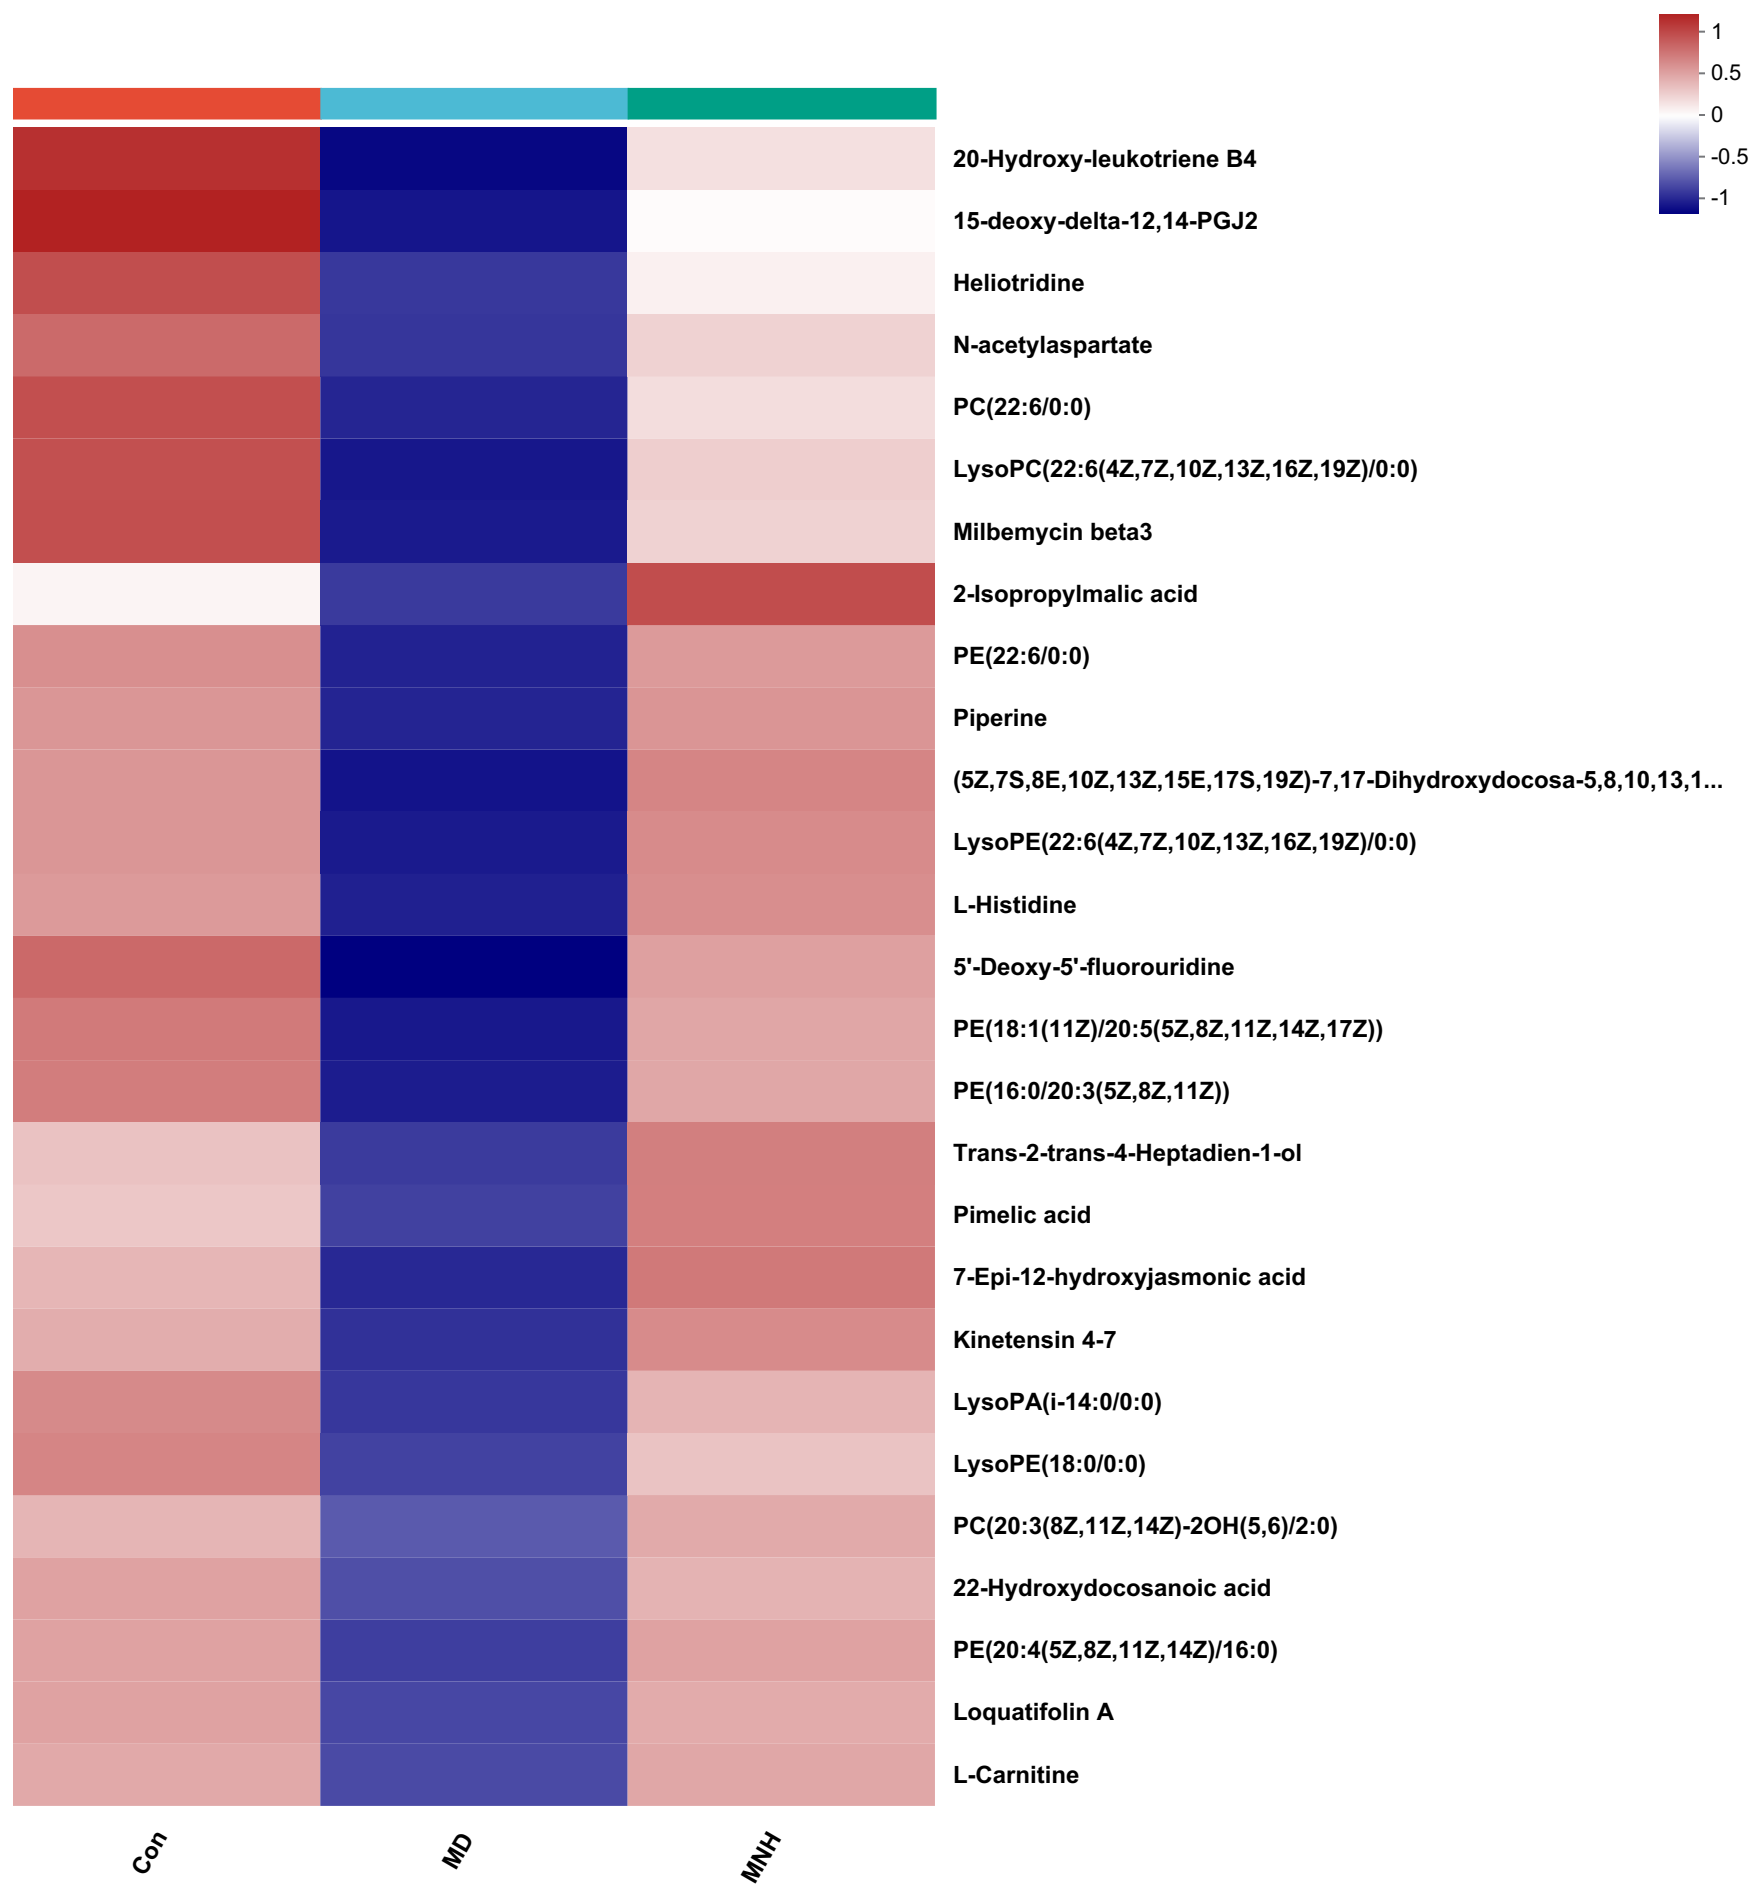

Supplement: d3ra03188h5.pdf [file d3ra03188h5.pdf]
